# Supplementary material for: Outcomes and Efficacy of Neuroendoscopic Resection of Intraventricular Tumors: A Systematic Review and Meta-Analysis
Source: Research Square preprint supplement (doi:10.21203/rs.3.rs-7367691/v1), 2025-10-22
Supplement: Supplementary file 1 [file 0724edde8f39694fdcd6a3fa.pdf]

**Title of the manuscript:**

# **Outcomes and Efficacy of Neuroendoscopic Resection of Intraventricular Tumors: A Systematic Review and Meta-Analysis**

**Journal: Neurosurgical Reviews**

**Authors:**

Muhammad Talha Khan <sup>1</sup> [mtalhakhan@kemu.edu.pk](mailto:mtalhakhan@kemu.edu.pk) , Undergraduate medical student

Arham Khalid Farooq <sup>1</sup> [arhamkhalid@kemu.edu.pk](mailto:arhamkhalid@kemu.edu.pk) , Undergraduate medical student

Bardia Hajikarimloo <sup>2</sup> [Bardii47@yahoo.com](mailto:Bardii47@yahoo.com) , Postdoctoral Research fellow

Shafin bin Amin <sup>3</sup> [shafin10th@gmail.com](mailto:shafin10th@gmail.com) , Postgraduate resident

Sara M. Darawish <sup>4</sup> [drawyshsart@gmail.com](mailto:drawyshsart@gmail.com) , Undergraduate medical student

Mohammed Huzaifa Khalid <sup>1</sup> [mhuzaifakhalid@kemu.edu.pk](mailto:mhuzaifakhalid@kemu.edu.pk) , Undergraduate medical student

Tooba Adil <sup>5</sup> [tooba.adil@jsmu.edu.pk](mailto:tooba.adil@jsmu.edu.pk) , Postgraduate Student

Elaf Ahmed Basha <sup>6</sup> [elafbasha44@gmail.com](mailto:elafbasha44@gmail.com) , Undergraduate medical student

Hamza Abid<sup>1</sup> [hamzaabid@kemu.edu.pk](mailto:hamzaabid@kemu.edu.pk) , Undergraduate medical student

**Affiliations:**

<sup>1</sup> King Edward Medical University, Lahore, Pakistan

<sup>2</sup> Department of Neurosurgery, University of Virginia, Charlottesville, VA, USA

<sup>3</sup> Jinnah Postgraduate Medical Center, Karachi, Pakistan

<sup>4</sup>Al-Quds University, Faculty of Medicine, Jerusalem, Palestine

<sup>5</sup> Jinnah Sindh Medical University, Karachi, Pakistan

<sup>6</sup> Faculty of Medicine and Health Sciences, Omdorman Islamic University, Khartoum, Sudan

**Corresponding Author:**

Muhammad Talha Khan

King Edward Medical University, Lahore, Pakistan

[mtalhakhan@kemu.edu.pk](mailto:mtalhakhan@kemu.edu.pk)

ORCID:0009-0005-5375-4046



| Study                    | Q1 | Q2 | Q3 | Q4 | Q5 | Q6 | Q7 | Q8 | Q9 | Q10 |
|--------------------------|----|----|----|----|----|----|----|----|----|-----|
| Samadian M               | ●  | ●  | ●  | ●  | ●  | ●  | ●  | ●  | ●  | ●   |
| Nazari Maloumeh E        | ●  | ●  | ●  | ●  | ●  | ●  | ●  | ●  | ●  | ●   |
| Verducci C               | ●  | ●  | ●  | ●  | ●  | ●  | ●  | ●  | ●  | ●   |
| Torres-Corzo JG          | ●  | ●  | ●  | ●  | ●  | ●  | ●  | ●  | ●  | ●   |
| Tawk RG                  | ●  | ●  | ●  | ●  | ●  | ●  | ●  | ●  | ●  | ●   |
| Shahrestani S            | ●  | ●  | ●  | ●  | ●  | ●  | ●  | ●  | ●  | ●   |
| Arnaout MM               | ●  | ●  | ●  | ●  | ●  | ●  | ●  | ●  | ●  | ●   |
| Greco et al.             | ●  | ●  | ●  | ●  | ●  | ●  | ●  | ●  | ●  | ●   |
| Ieasca et al.            | ●  | ●  | ●  | ●  | ●  | ●  | ●  | ●  | ●  | ●   |
| Boogaarts et al.         | ●  | ●  | ●  | ●  | ●  | ●  | ●  | ●  | ●  | ●   |
| Sankhla et al.           | ●  | ●  | ●  | ●  | ●  | ●  | ●  | ●  | ●  | ●   |
| Eshra                    | ●  | ●  | ●  | ●  | ●  | ●  | ●  | ●  | ●  | ●   |
| Yan et al.               | ●  | ●  | ●  | ●  | ●  | ●  | ●  | ●  | ●  | ●   |
| Vorbau C                 | ●  | ●  | ●  | ●  | ●  | ●  | ●  | ●  | ●  | ●   |
| Dhandapani S             | ●  | ●  | ●  | ●  | ●  | ●  | ●  | ●  | ●  | ●   |
| Ibáñez-Botella G (2024)  | ●  | ●  | ●  | ●  | ●  | ●  | ●  | ●  | ●  | ●   |
| Iacoangeli M             | ●  | ●  | ●  | ●  | ●  | ●  | ●  | ●  | ●  | ●   |
| Lara-Reyna JJ (Study 18) | ●  | ●  | ●  | ●  | ●  | ●  | ●  | ●  | ●  | ●   |
| Lara-Reyna JJ (Study 19) | ●  | ●  | ●  | ●  | ●  | ●  | ●  | ●  | ●  | ●   |
| Roth J                   | ●  | ●  | ●  | ●  | ●  | ●  | ●  | ●  | ●  | ●   |
| Ebel F                   | ●  | ●  | ●  | ●  | ●  | ●  | ●  | ●  | ●  | ●   |
| Koutourosiou M           | ●  | ●  | ●  | ●  | ●  | ●  | ●  | ●  | ●  | ●   |
| Margetis K               | ●  | ●  | ●  | ●  | ●  | ●  | ●  | ●  | ●  | ●   |
| Raouf A                  | ●  | ●  | ●  | ●  | ●  | ●  | ●  | ●  | ●  | ●   |
| Ibáñez-Botella G (2019)  | ●  | ●  | ●  | ●  | ●  | ●  | ●  | ●  | ●  | ●   |
| Qiao N (Study 26)        | ●  | ●  | ●  | ●  | ●  | ●  | ●  | ●  | ●  | ●   |
| Qiao N (Study 27)        | ●  | ●  | ●  | ●  | ●  | ●  | ●  | ●  | ●  | ●   |

● Yes      ● No  
 ● Unclear      ● Not applicable

Supplementary Figure 1: Joanna Briggs Institute (JBI) Critical

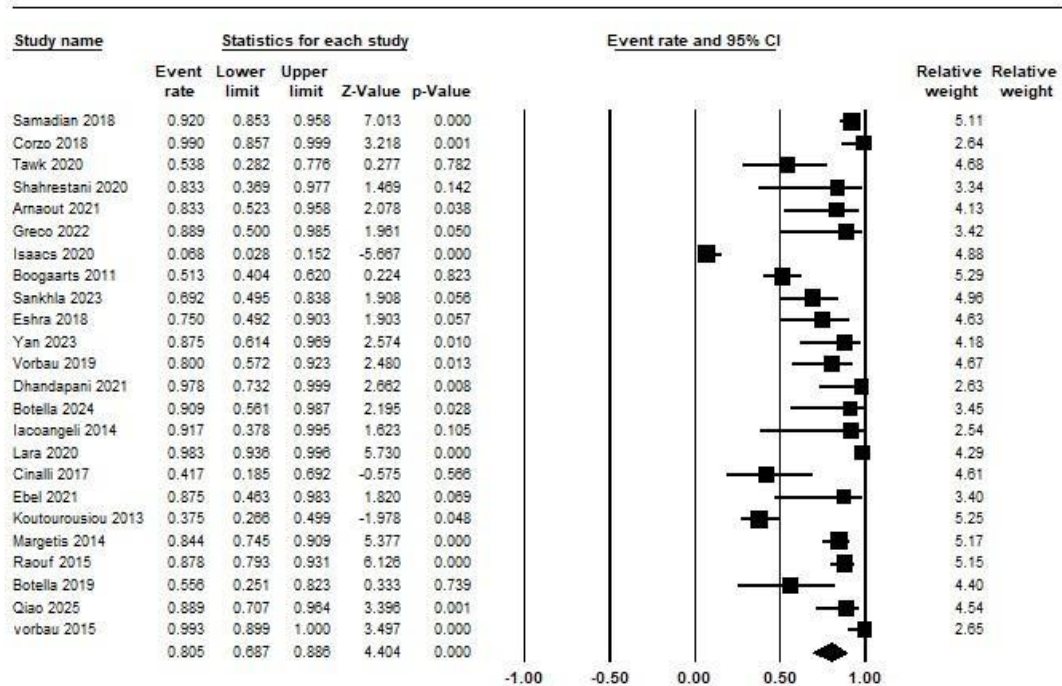

**Supplementary Figure 2: Sensitivity analysis of Gross total resection**

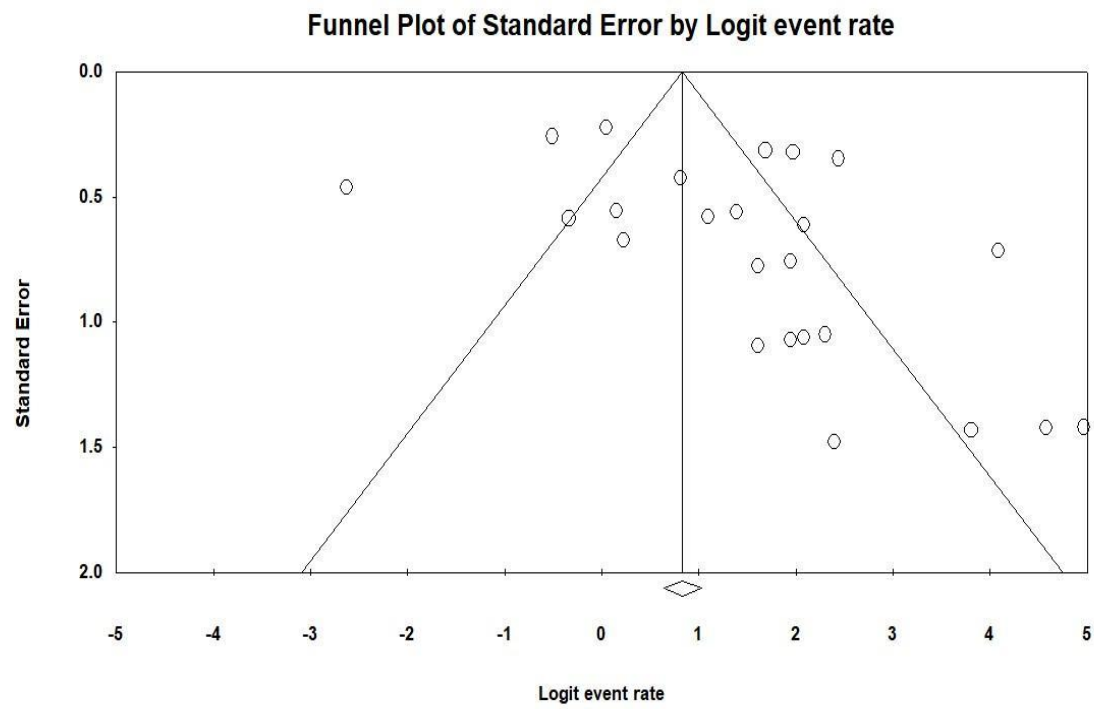

**Supplementary Figure 3: Funnel plot of Gross total resection**

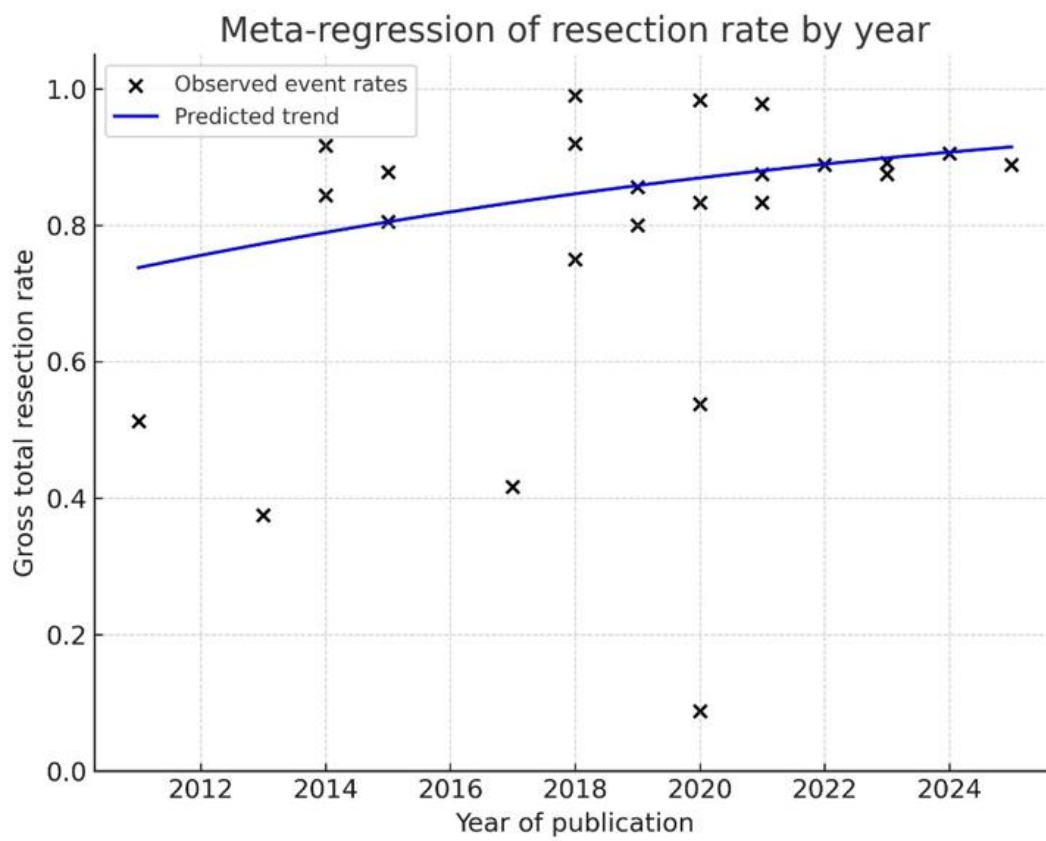

**Supplementary Figure 4: Meta-regression analysis of Gross total resection**

## Subtotal Resection

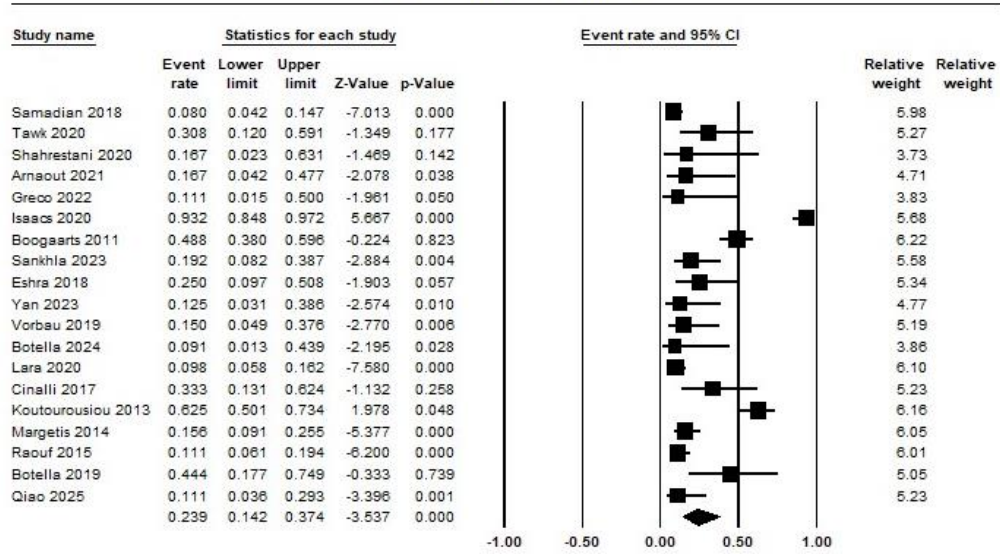

Supplementary Figure 5: Forest plot of Subtotal resection



| Model  | Effect size and 95% interval |                |             |             | Test of null (2-Tail) |         | Heterogeneity |        |         |           | Tau-squared |                |          |       |
|--------|------------------------------|----------------|-------------|-------------|-----------------------|---------|---------------|--------|---------|-----------|-------------|----------------|----------|-------|
| Model  | Number Studies               | Point estimate | Lower limit | Upper limit | Z-value               | P-value | Q-value       | df (Q) | P-value | I-squared | Tau Squared | Standard Error | Variance | Tau   |
| Fixed  | 19                           | 0.282          | 0.245       | 0.322       | -9.566                | 0.000   | 174.684       | 18     | 0.000   | 89.696    | 1.665       | 0.804          | 0.647    | 1.290 |
| Random | 19                           | 0.239          | 0.142       | 0.374       | -3.537                | 0.000   |               |        |         |           |             |                |          |       |

**Supplementary Figure 6: Heterogeneity statistics of Subtotal resection**

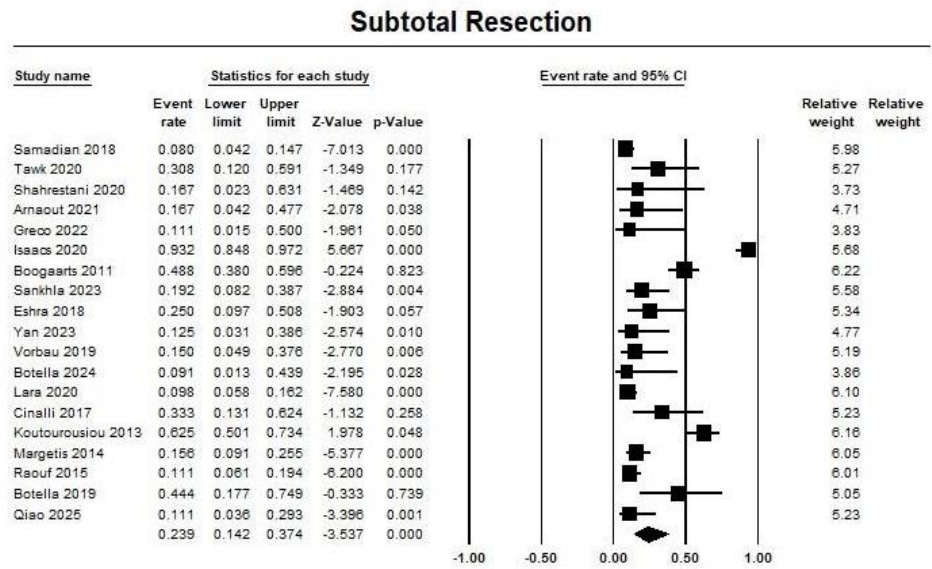

**Supplementary Figure 7: Sensitivity analysis of Subtotal resection**

| Model  | Effect size and 95% interval |                |             |             | Test of null (2-Tail) |         | Heterogeneity |        |         |           | Tau-squared |                |          |       |
|--------|------------------------------|----------------|-------------|-------------|-----------------------|---------|---------------|--------|---------|-----------|-------------|----------------|----------|-------|
| Model  | Number Studies               | Point estimate | Lower limit | Upper limit | Z-value               | P-value | Q-value       | df (Q) | P-value | I-squared | Tau Squared | Standard Error | Variance | Tau   |
| Fixed  | 18                           | 0.250          | 0.215       | 0.288       | -11.010               | 0.000   | 112.848       | 17     | 0.000   | 84.935    | 1.075       | 0.557          | 0.310    | 1.037 |
| Random | 18                           | 0.203          | 0.128       | 0.306       | -4.863                | 0.000   |               |        |         |           |             |                |          |       |

**Supplementary Figure 8: Heterogeneity statistics of the Sensitivity analysis of Subtotal resection**

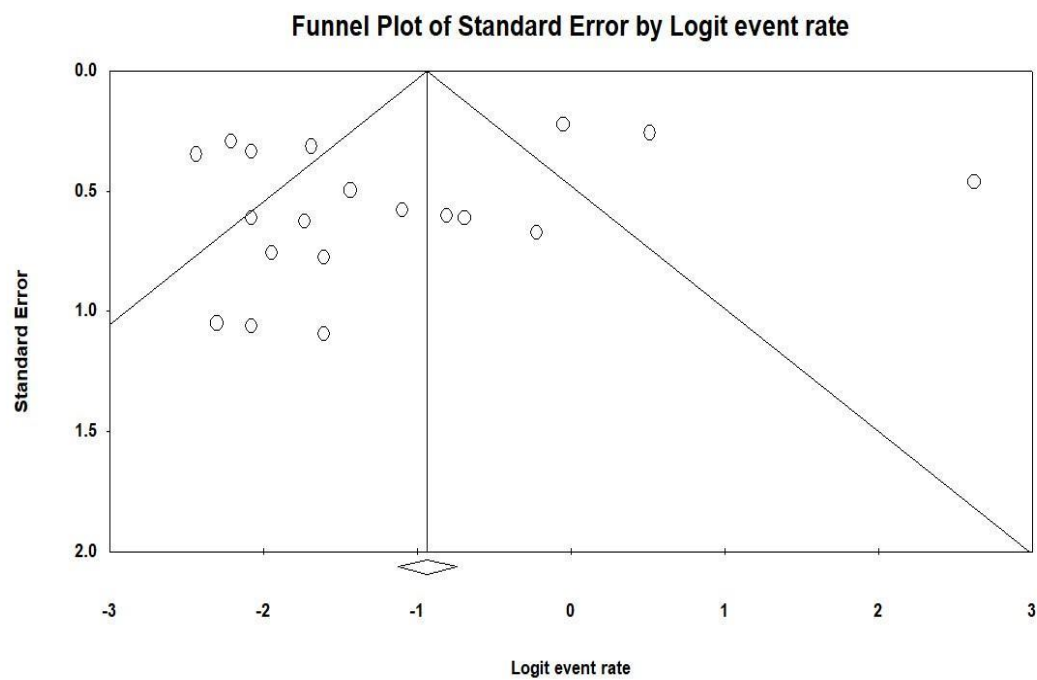

**Supplementary Figure 9: Funnel plot of Subtotal resection**

## Mean Operative time (mins)

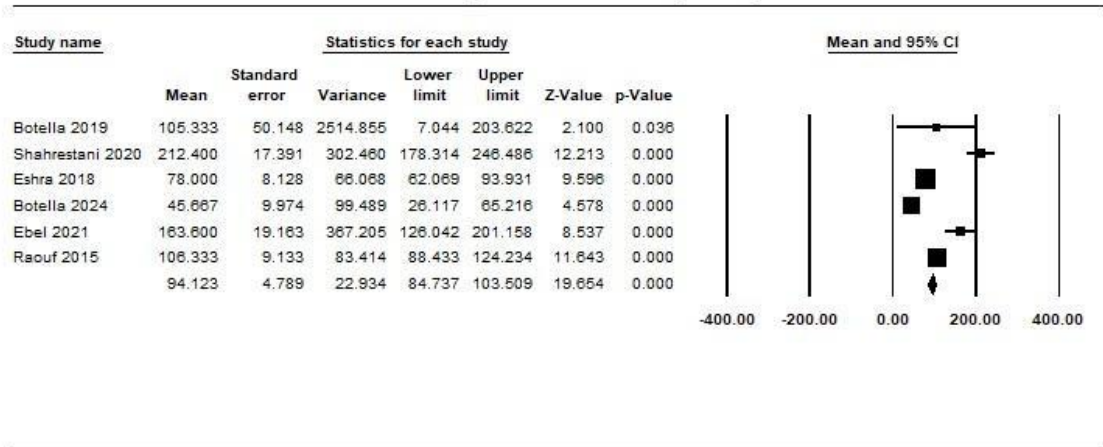

Supplementary Figure 10: Forest plot of mean operative time

| Model  |                | Effect size and 95% confidence interval |                |          |             |             | Test of null (2-Tail) |         | Heterogeneity |        |         |           | Tau-squared |                |            |        |
|--------|----------------|-----------------------------------------|----------------|----------|-------------|-------------|-----------------------|---------|---------------|--------|---------|-----------|-------------|----------------|------------|--------|
| Model  | Number Studies | Point estimate                          | Standard error | Variance | Lower limit | Upper limit | Z-value               | P-value | Q-value       | df (Q) | P-value | I-squared | Tau Squared | Standard Error | Variance   | Tau    |
| Fixed  | 6              | 94.123                                  | 4.789          | 22.934   | 84.737      | 103.509     | 19.654                | 0.000   | 88.770        | 5      | 0.000   | 94.367    | 2592.619    | 2147.889       | 4613428.46 | 50.918 |
| Random | 6              | 117.630                                 | 22.359         | 499.917  | 73.808      | 161.453     | 5.261                 | 0.000   |               |        |         |           |             |                |            |        |

**Supplementary Figure 11:Heterogeneity statistics of mean operative time**

## Mean Operative time (mins)

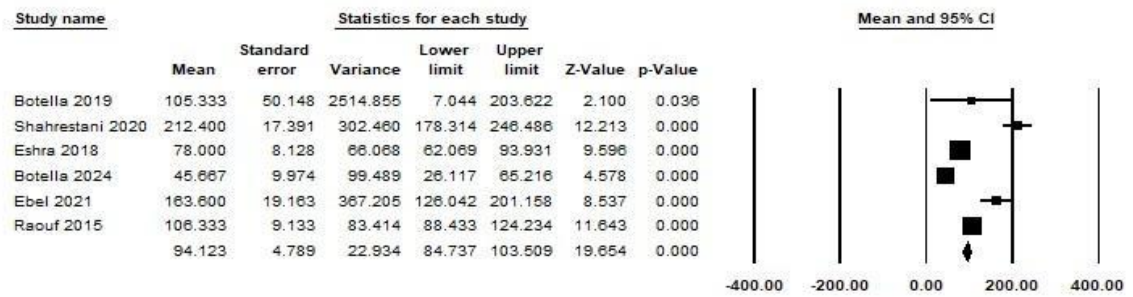

Supplementary Figure 12: Sensitivity analysis of mean operative time

| Model  | Effect size and 95% confidence interval |                |                |          |             |             | Test of null (2-Tail) |         | Heterogeneity |        |         |           | Tau-squared |                |            |        |
|--------|-----------------------------------------|----------------|----------------|----------|-------------|-------------|-----------------------|---------|---------------|--------|---------|-----------|-------------|----------------|------------|--------|
| Model  | Number Studies                          | Point estimate | Standard error | Variance | Lower limit | Upper limit | Z-value               | P-value | Q-value       | df (Q) | P-value | I-squared | Tau Squared | Standard Error | Variance   | Tau    |
| Fixed  | 5                                       | 84.419         | 4.982          | 24.816   | 74.655      | 94.183      | 16.946                | 0.000   | 38.723        | 4      | 0.000   | 89.670    | 1224.825    | 1165.852       | 1359210.87 | 34.998 |
| Random | 5                                       | 96.284         | 17.706         | 313.511  | 61.580      | 130.987     | 5.438                 | 0.000   |               |        |         |           |             |                |            |        |

**Supplementary Figure 13: Heterogeneity statistics of the Sensitivity analysis of mean operative time**



## Intraoperative Hemorrhage

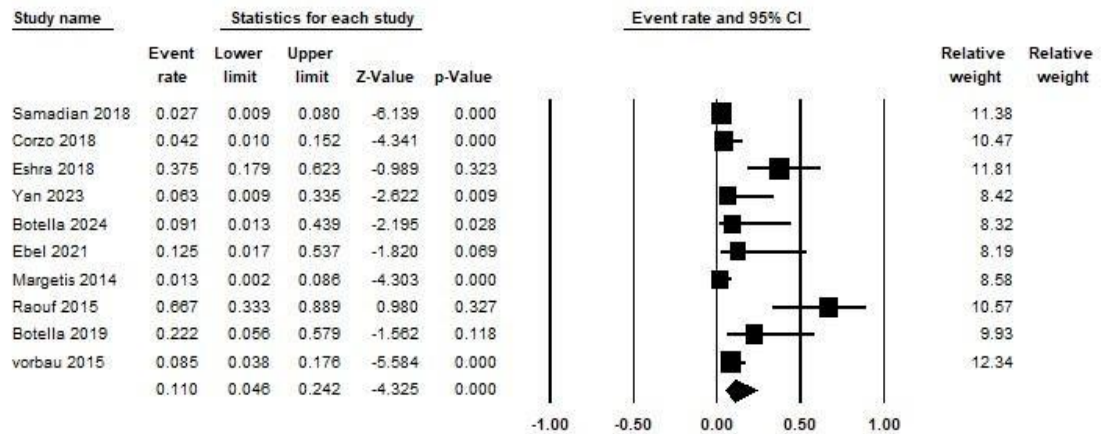

Supplementary Figure 14: Forest plot of Intraoperative time

| Model  | Effect size and 95% interval |                |             |             | Test of null (2-Tail) |         | Heterogeneity |        |         |           | Tau-squared |                |          |       |
|--------|------------------------------|----------------|-------------|-------------|-----------------------|---------|---------------|--------|---------|-----------|-------------|----------------|----------|-------|
| Model  | Number Studies               | Point estimate | Lower limit | Upper limit | Z-value               | P-value | Q-value       | df (Q) | P-value | I-squared | Tau Squared | Standard Error | Variance | Tau   |
| Fixed  | 10                           | 0.086          | 0.060       | 0.123       | -11.781               | 0.000   | 24.858        | 9      | 0.003   | 63.795    | 0.748       | 0.603          | 0.364    | 0.865 |
| Random | 10                           | 0.081          | 0.042       | 0.152       | -6.753                | 0.000   |               |        |         |           |             |                |          |       |

**Supplementary Figure 15:Heterogeneity statistics of Intraoperative time**

## Intraoperative Hemorrhage

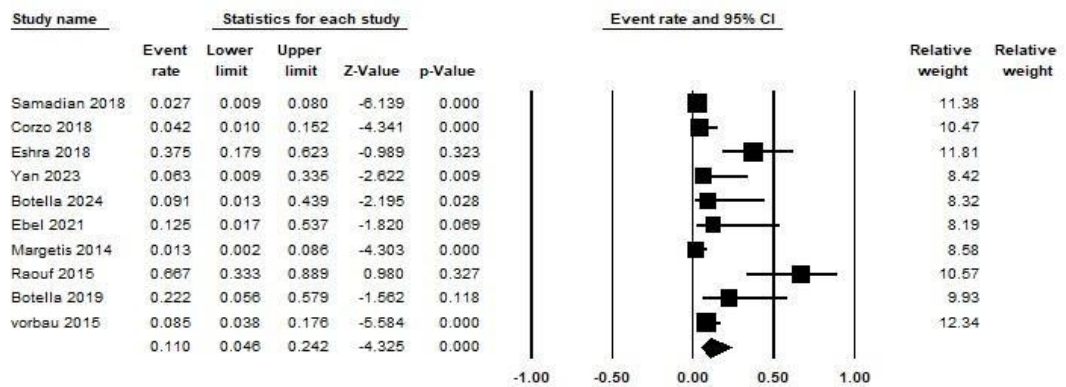

Supplementary Figure 16: Sensitivity analysis of Intraoperative time

| Model  |                | Effect size and 95% interval |             |             | Test of null (2-Tail) |         | Heterogeneity |        |         |           | Tau-squared |                |          |       |
|--------|----------------|------------------------------|-------------|-------------|-----------------------|---------|---------------|--------|---------|-----------|-------------|----------------|----------|-------|
| Model  | Number Studies | Point estimate               | Lower limit | Upper limit | Z-value               | P-value | Q-value       | df (Q) | P-value | I-squared | Tau Squared | Standard Error | Variance | Tau   |
| Fixed  | 9              | 0.064                        | 0.043       | 0.094       | -12.365               | 0.000   | 9.784         | 8      | 0.280   | 18.237    | 0.102       | 0.283          | 0.080    | 0.320 |
| Random | 9              | 0.063                        | 0.039       | 0.100       | -10.674               | 0.000   |               |        |         |           |             |                |          |       |

**Supplementary Figure 17:Heterogeneity statistics of the Sensitivity analysis of intraoperative time**

## Tumor Recurrence Rate

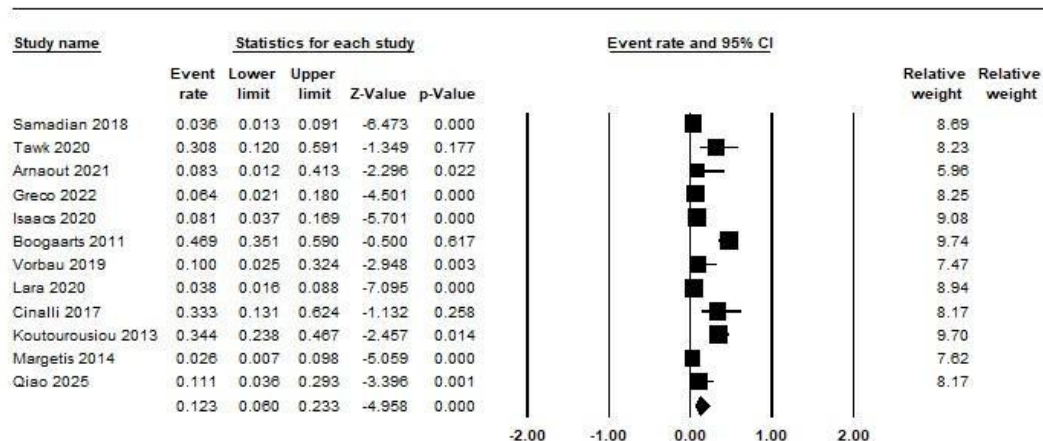

**Supplementary Figure 18: Forest plot of Tumour recurrence rate**

| Model  |                | Effect size and 95% interval |             |             | Test of null (2-Tail) |         | Heterogeneity |        |         |           | Tau-squared |                |          |       |
|--------|----------------|------------------------------|-------------|-------------|-----------------------|---------|---------------|--------|---------|-----------|-------------|----------------|----------|-------|
| Model  | Number Studies | Point estimate               | Lower limit | Upper limit | Z-value               | P-value | Q-value       | df (Q) | P-value | I-squared | Tau Squared | Standard Error | Variance | Tau   |
| Fixed  | 12             | 0.200                        | 0.163       | 0.243       | -10.753               | 0.000   | 89.828        | 11     | 0.000   | 87.754    | 1.555       | 0.950          | 0.902    | 1.247 |
| Random | 12             | 0.123                        | 0.060       | 0.233       | -4.958                | 0.000   |               |        |         |           |             |                |          |       |

**Supplementary Figure 19: Heterogeneity statistics of Tumour recurrence rate**

## Tumour recurrence rate

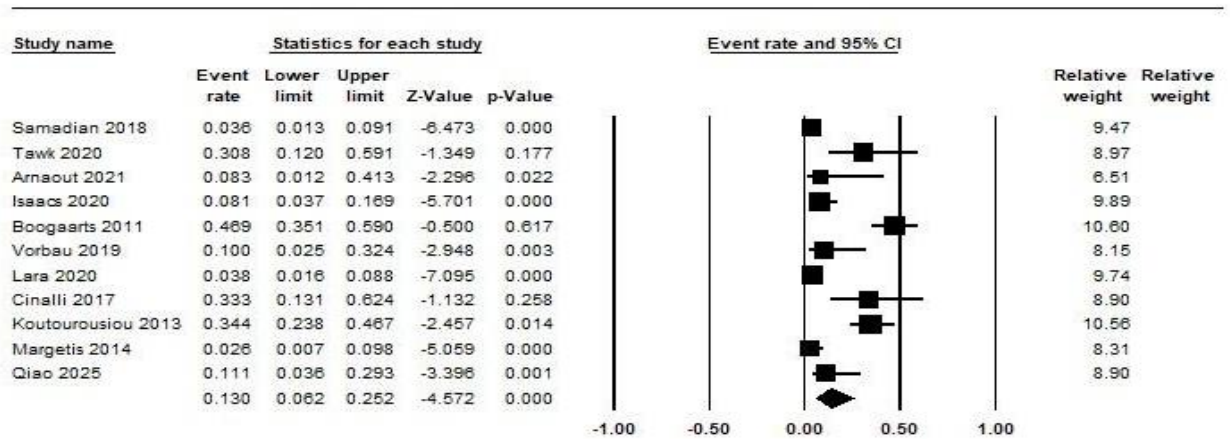

**Supplementary Figure 20: Sensitivity analysis of Tumour recurrence rate**

| Model  |                | Effect size and 95% interval |             |             | Test of null (2-Tail) |         | Heterogeneity |        |         |           | Tau-squared |                |          |       |
|--------|----------------|------------------------------|-------------|-------------|-----------------------|---------|---------------|--------|---------|-----------|-------------|----------------|----------|-------|
| Model  | Number Studies | Point estimate               | Lower limit | Upper limit | Z-value               | P-value | Q-value       | df (Q) | P-value | I-squared | Tau Squared | Standard Error | Variance | Tau   |
| Fixed  | 11             | 0.137                        | 0.106       | 0.176       | -12.243               | 0.000   | 55.317        | 10     | 0.000   | 81.922    | 1.222       | 0.776          | 0.602    | 1.106 |
| Random | 11             | 0.103                        | 0.052       | 0.195       | -5.701                | 0.000   |               |        |         |           |             |                |          |       |

**Supplementary Figure 21:Heterogeneity statistics of the Sensitivity analysis of Tumour recurrence rate**



## Survival Rate

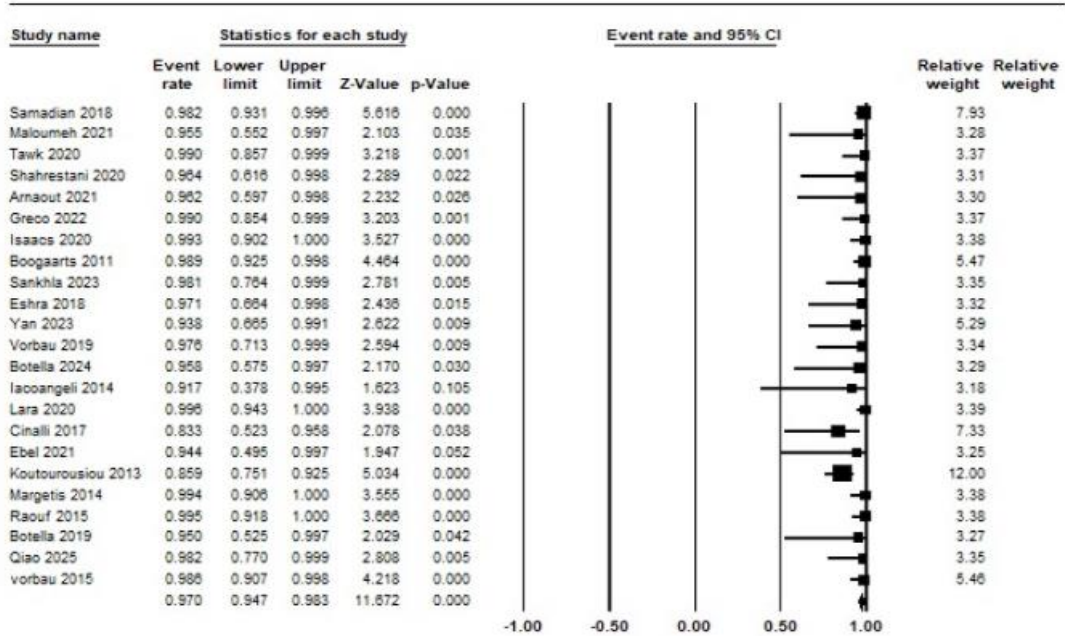

Supplementary Figure 22: Forest plot of survival rate

| Model  |                | Effect size and 95% interval |             |             | Test of null (2-Tail) |         | Heterogeneity |        |         |           | Tau-squared |                |          |       |
|--------|----------------|------------------------------|-------------|-------------|-----------------------|---------|---------------|--------|---------|-----------|-------------|----------------|----------|-------|
| Model  | Number Studies | Point estimate               | Lower limit | Upper limit | Z-value               | P-value | Q-value       | df (Q) | P-value | I-squared | Tau Squared | Standard Error | Variance | Tau   |
| Fixed  | 23             | 0.953                        | 0.931       | 0.969       | 14.313                | 0.000   | 33.763        | 22     | 0.052   | 34.840    | 0.610       | 0.572          | 0.328    | 0.781 |
| Random | 23             | 0.970                        | 0.947       | 0.983       | 11.672                | 0.000   |               |        |         |           |             |                |          |       |

**Supplementary Figure 23:Heterogeneity statistics of survival rate**

## Infection (meningitis/Abscess)

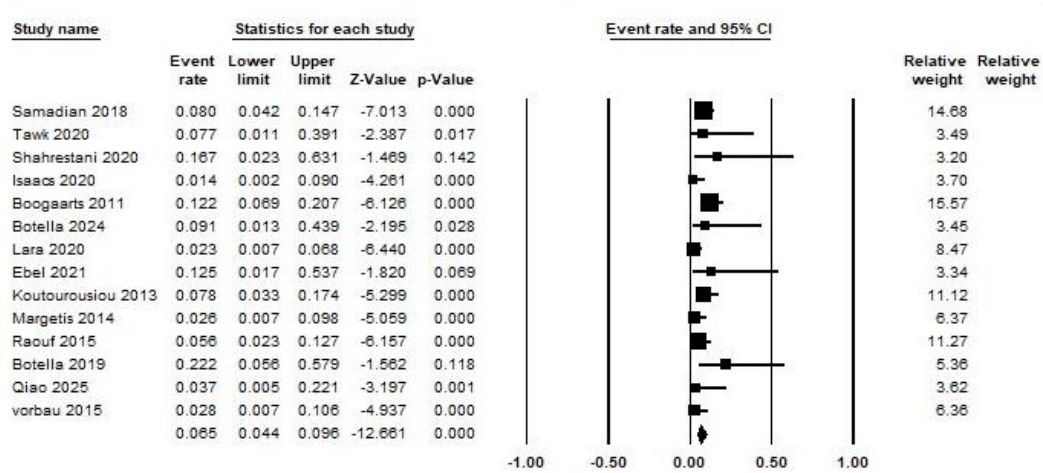

Supplementary Figure 24: Forest plot of post-surgery infection

| Model  | Effect size and 95% interval |                |             |             | Test of null (2-Tail) |         | Heterogeneity |        |         |           | Tau-squared |                |          |       |
|--------|------------------------------|----------------|-------------|-------------|-----------------------|---------|---------------|--------|---------|-----------|-------------|----------------|----------|-------|
| Model  | Number Studies               | Point estimate | Lower limit | Upper limit | Z-value               | P-value | Q-value       | df (Q) | P-value | I-squared | Tau Squared | Standard Error | Variance | Tau   |
| Fixed  | 14                           | 0.071          | 0.053       | 0.094       | -16.479               | 0.000   | 19.393        | 13     | 0.111   | 32.965    | 0.180       | 0.223          | 0.050    | 0.424 |
| Random | 14                           | 0.065          | 0.044       | 0.096       | -12.661               | 0.000   |               |        |         |           |             |                |          |       |

**Supplementary Figure 25:Heterogeneity statistics of post-surgery infection**

## New Neurological Deficits

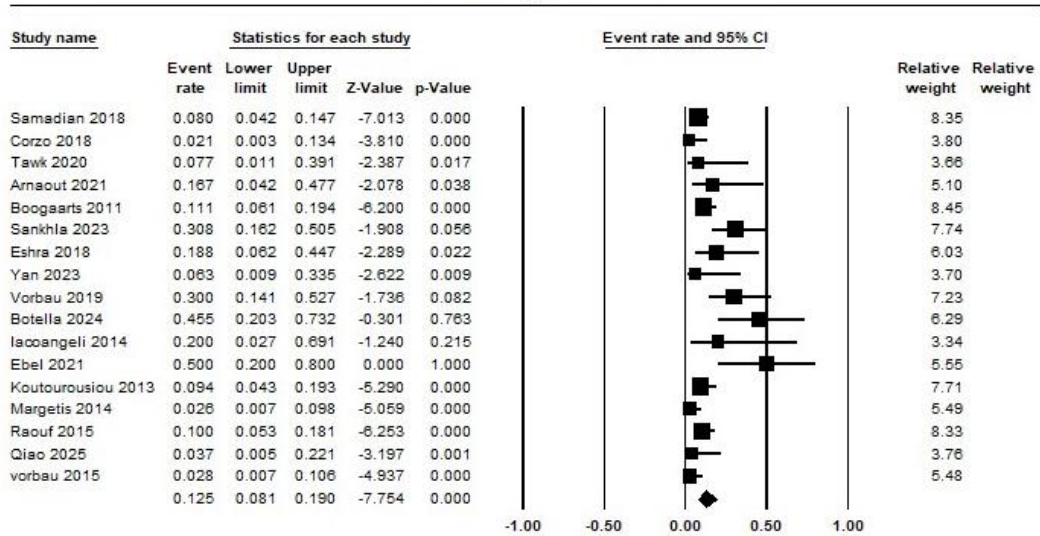

**Supplementary Figure 26: Forest plot of New Neurologic deficits**

| Model  | Effect size and 95% interval |                |             |             | Test of null (2-Tail) |         | Heterogeneity |        |         |           | Tau-squared |                |          |       |
|--------|------------------------------|----------------|-------------|-------------|-----------------------|---------|---------------|--------|---------|-----------|-------------|----------------|----------|-------|
| Model  | Number Studies               | Point estimate | Lower limit | Upper limit | Z-value               | P-value | Q-value       | df (Q) | P-value | I-squared | Tau Squared | Standard Error | Variance | Tau   |
| Fixed  | 17                           | 0.129          | 0.103       | 0.161       | -14.524               | 0.000   | 48.879        | 16     | 0.000   | 67.266    | 0.630       | 0.375          | 0.140    | 0.794 |
| Random | 17                           | 0.125          | 0.081       | 0.190       | -7.754                | 0.000   |               |        |         |           |             |                |          |       |

**Supplementary Figure 27:Heterogeneity statistics of New Neurologic deficits**

## New Neurological Deficits

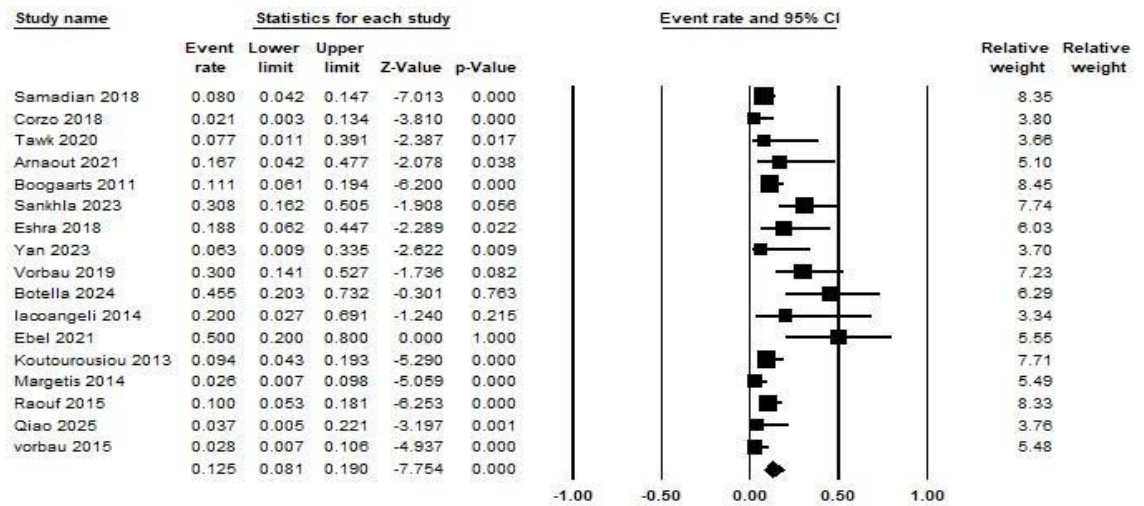

Supplementary Figure 28: Sensitivity analysis of New Neurologic Deficits

| Model  | Effect size and 95% interval |                |             |             | Test of null (2-Tail) |         | Heterogeneity |        |         |           | Tau-squared |                |          |       |
|--------|------------------------------|----------------|-------------|-------------|-----------------------|---------|---------------|--------|---------|-----------|-------------|----------------|----------|-------|
|        | Number Studies               | Point estimate | Lower limit | Upper limit | Z-value               | P-value | Q-value       | df (Q) | P-value | I-squared | Tau Squared | Standard Error | Variance | Tau   |
| Fixed  | 16                           | 0.120          | 0.094       | 0.150       | -14.812               | 0.000   | 40.327        | 15     | 0.000   | 62.804    | 0.514       | 0.334          | 0.112    | 0.717 |
| Random | 16                           | 0.114          | 0.074       | 0.171       | -8.451                | 0.000   |               |        |         |           |             |                |          |       |

**Supplementary Figure 29: Heterogeneity statistics of the Sensitivity analysis of New Neurologic deficits**



## Hydrocephalus Resolution Rate

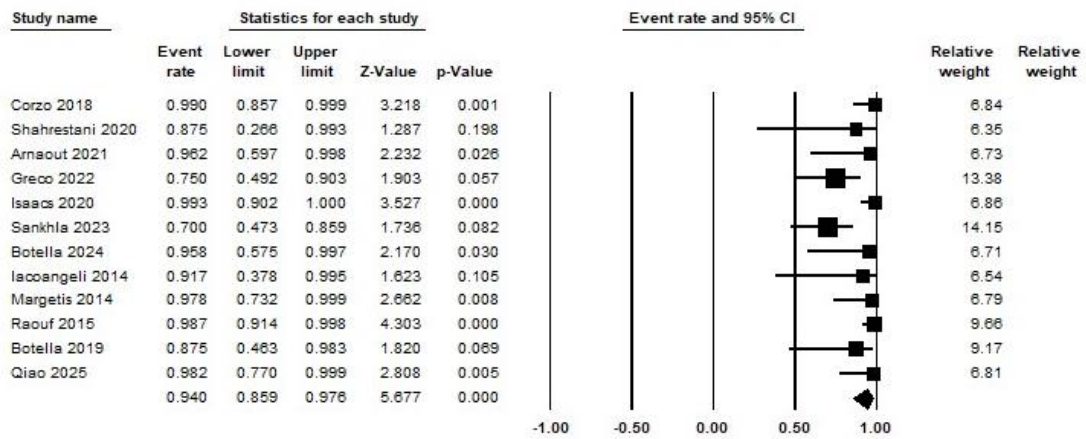

Supplementary Figure 30: Forest plot of resolution of hydrocephalus

| Model  |                | Effect size and 95% interval |             |             | Test of null (2-Tail) |         | Heterogeneity |        |         |           | Tau-squared |                |          |       |
|--------|----------------|------------------------------|-------------|-------------|-----------------------|---------|---------------|--------|---------|-----------|-------------|----------------|----------|-------|
| Model  | Number Studies | Point estimate               | Lower limit | Upper limit | Z-value               | P-value | Q-value       | df (Q) | P-value | I-squared | Tau Squared | Standard Error | Variance | Tau   |
| Fixed  | 12             | 0.886                        | 0.818       | 0.931       | 7.356                 | 0.000   | 26.095        | 11     | 0.006   | 57.847    | 1.431       | 1.210          | 1.464    | 1.196 |
| Random | 12             | 0.940                        | 0.859       | 0.976       | 5.677                 | 0.000   |               |        |         |           |             |                |          |       |

**Supplementary Figure 31:**Heterogeneity statistics resolution of hydrocephalus

## Hydrocephalus Resolution Rate

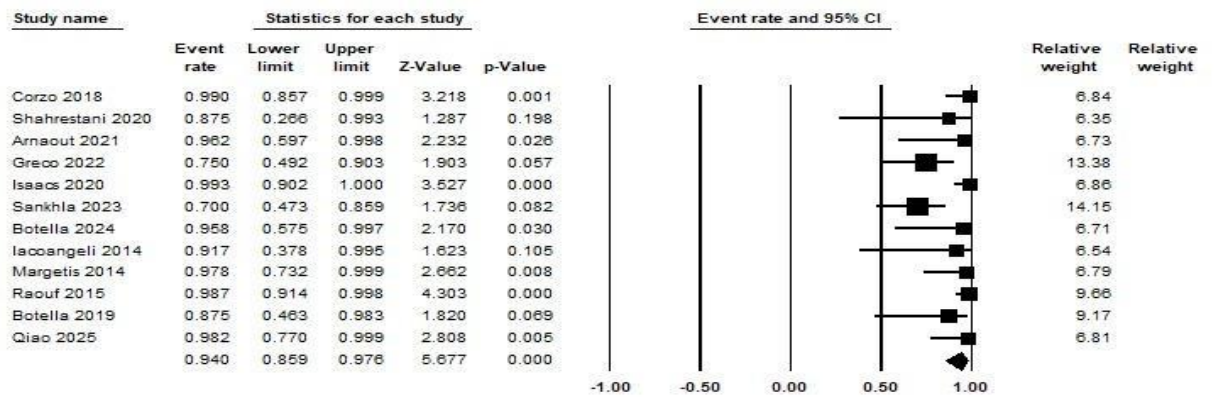

Supplementary Figure 32: sensitivity analysis of the resolution of hydrocephalus

| Model  |                | Effect size and 95% interval |             |             | Test of null (2-Tail) |         | Heterogeneity |        |         |           | Tau-squared |                |          |       |
|--------|----------------|------------------------------|-------------|-------------|-----------------------|---------|---------------|--------|---------|-----------|-------------|----------------|----------|-------|
| Model  | Number Studies | Point estimate               | Lower limit | Upper limit | Z-value               | P-value | Q-value       | df (Q) | P-value | I-squared | Tau Squared | Standard Error | Variance | Tau   |
| Fixed  | 11             | 0.933                        | 0.877       | 0.964       | 7.752                 | 0.000   | 17.098        | 10     | 0.072   | 41.513    | 0.980       | 1.100          | 1.211    | 0.990 |
| Random | 11             | 0.954                        | 0.890       | 0.981       | 6.307                 | 0.000   |               |        |         |           |             |                |          |       |

**Supplementary Figure 33: Heterogeneity statistics sensitivity analysis of the resolution of hydrocephalus**

## Permanent shunt requirement

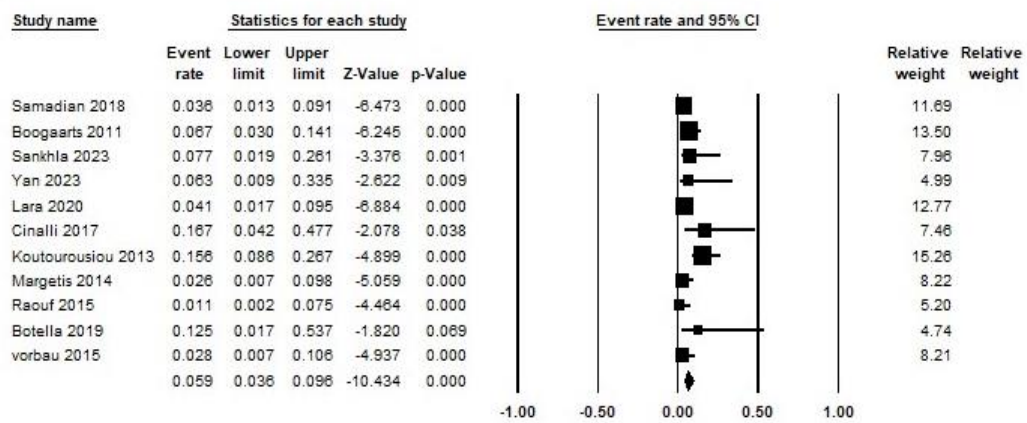

**Supplementary Figure 34: Forest plot of permanent shunt requirement**

| Model  |                | Effect size and 95% interval |             |             | Test of null (2-Tail) |         | Heterogeneity |        |         |           | Tau-squared |                |          |       |
|--------|----------------|------------------------------|-------------|-------------|-----------------------|---------|---------------|--------|---------|-----------|-------------|----------------|----------|-------|
| Model  | Number Studies | Point estimate               | Lower limit | Upper limit | Z-value               | P-value | Q-value       | df (Q) | P-value | I-squared | Tau Squared | Standard Error | Variance | Tau   |
| Fixed  | 11             | 0.067                        | 0.048       | 0.092       | -15.114               | 0.000   | 19.634        | 10     | 0.033   | 49.069    | 0.343       | 0.331          | 0.110    | 0.585 |
| Random | 11             | 0.059                        | 0.036       | 0.096       | -10.434               | 0.000   |               |        |         |           |             |                |          |       |

**Supplementary Figure 35: Heterogeneity statistics of permanent shunt requirement**
